# Supplementary material
Source: PubMed Central journal article supplement (PMC4178616)
Supplement: AEM.01030-14_zam999105658so1.pdf [file AEM.01030-14_zam999105658so1.pdf]

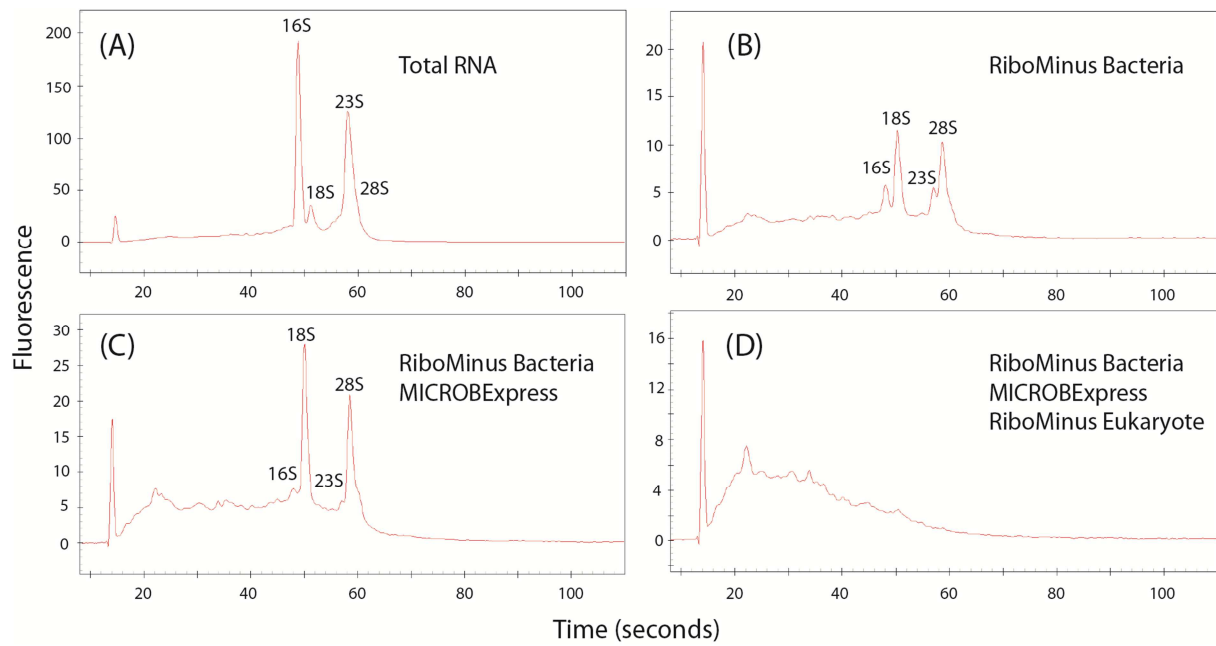

**FIG S1** The relative abundance of different sized RNA fragments in the sample Sa. (A) total RNA; (B) after treatment with the RiboMinus bacteria kit; (C) after treatment with the RiboMinus bacteria kit and the MICROBExpress kit; (D) after treatment with the RiboMinus bacteria kit, the MICROBExpress kit and the RiboMinus Eukaryote kit. 16S: 16S rRNA; 18S: 18S rRNA; 23S: 23S rRNA; 28S: 28S rRNA. Fluorescence is equivalent to the abundance of RNA fragments. Time is equivalent to size of fragments. The relative abundance of RNA fragments can be compared within and between treatments.

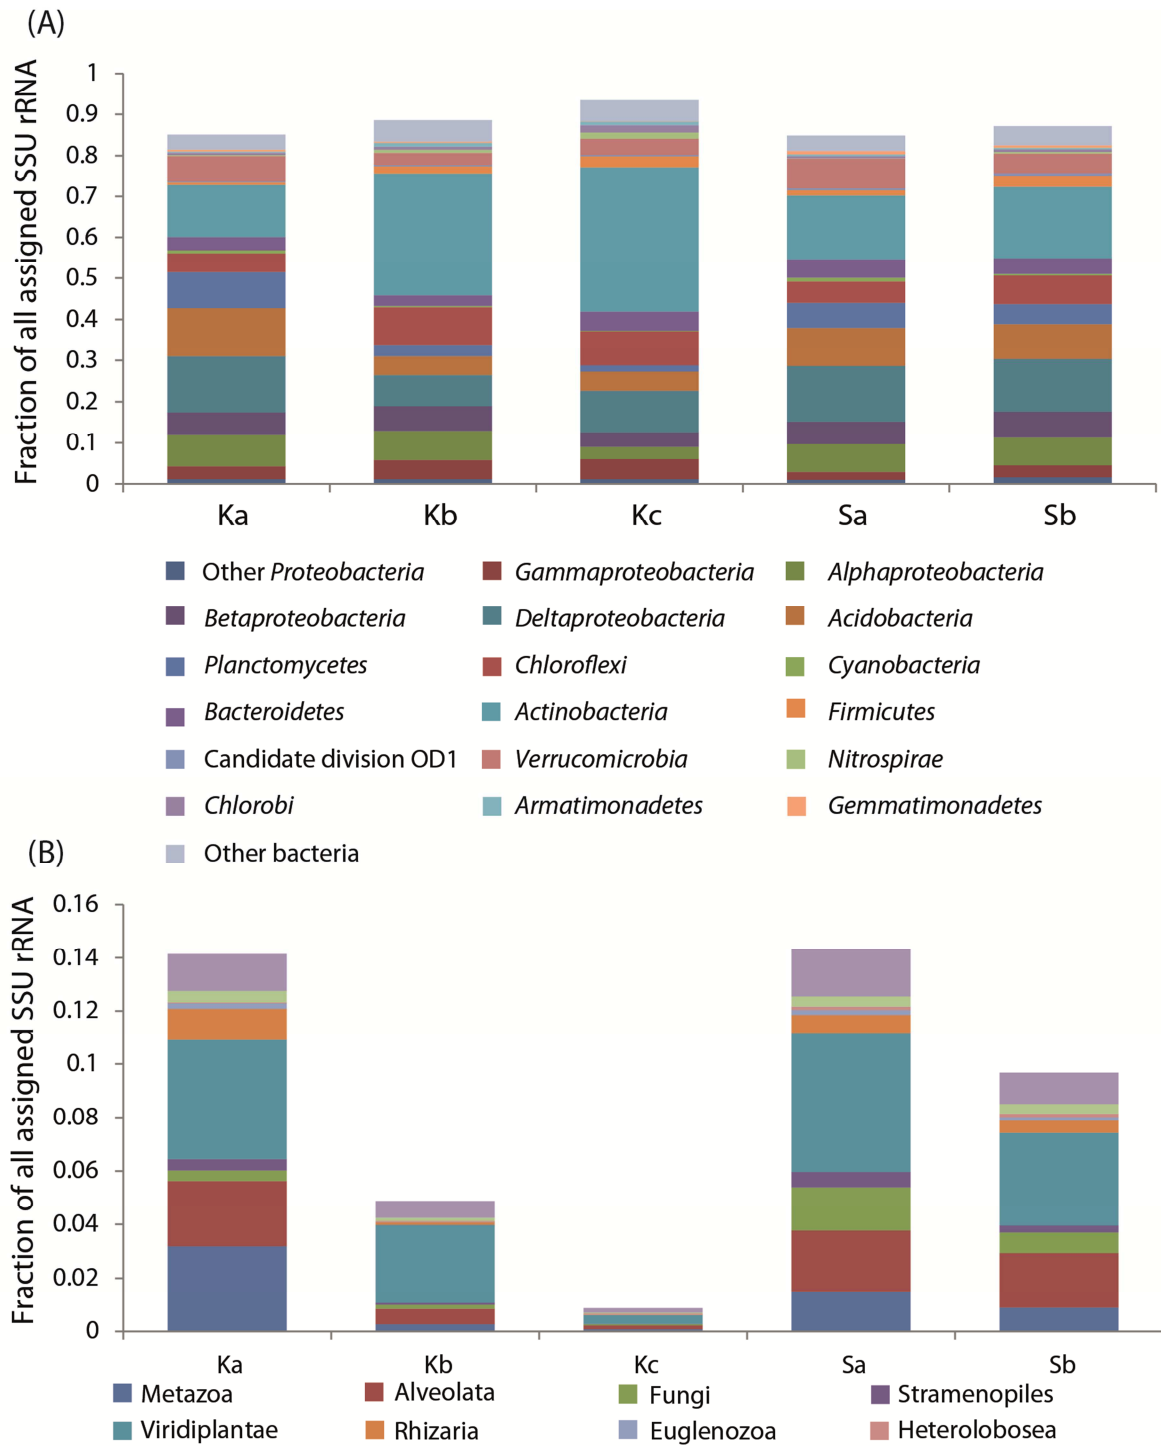

**FIG S2** Bacteria (A) and Eukarya (B) community profiles based on 16S rRNA and 18S rRNA respectively, at the different depths of Knudsenheia (Ka, Kb, Kc) and Solvatn (Sa, Sb). Column sizes represent the fraction of all assigned sequences assigned to these taxa at phylum/class-level taxonomy. The taxon names from top left corresponds row by row with the columns from bottom to top.

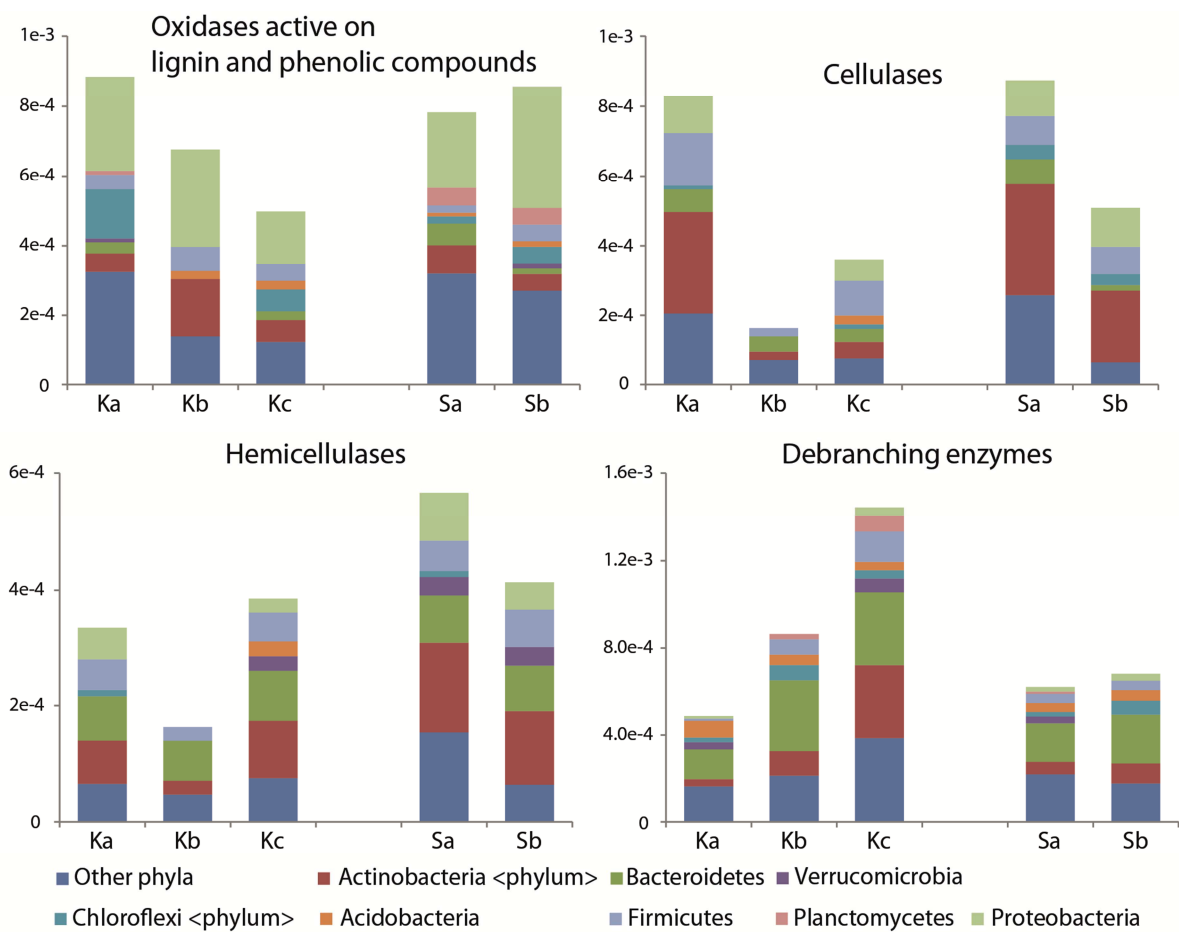

**FIG S3** Taxonomic assignment of transcripts encoding oxidases, cellulases, endohemicellulases, and debranching enzymes. Protein family domains were identified by searches in the Pfam database. Sequences containing identified domains were taxonomically assigned using BLASTP (see Materials and methods).

**TABLE S1** Nucleic acids extraction

| Sample | Extracted nucleic acids ( $\mu\text{g gdw}^{-1}$ ) | Spectrophotometric measurement ratio |         | Extracted RNA ( $\mu\text{g gdw}^{-1}$ ) |    | cDNA synthesis efficiency (%) |
|--------|----------------------------------------------------|--------------------------------------|---------|------------------------------------------|----|-------------------------------|
|        |                                                    | 260/280                              | 260/230 | % RNA                                    |    |                               |
| Sa     | 526                                                | 1.9                                  | 1.9     | 185                                      | 35 | 29                            |
| Sb     | 375                                                | 2.0                                  | 1.8     | 80                                       | 21 | 2                             |
| Ka     | 574                                                | 2.0                                  | 1.7     | 135                                      | 24 | >90                           |
| Kb     | 137                                                | 1.9                                  | 1.4     | 26                                       | 19 | 1                             |
| Kc     | 131                                                | 1.9                                  | 1.1     | 20                                       | 15 | 4                             |

**TABLE S2** mRNA enrichment by removal of rRNA molecules. \*Sa 1 and Sa 2 were pooled to provide a larger pool after this step. One sample was terminated after each kit to provide material for analysis of kit specific effect on rRNA removal. RiboBac: RiboMinus Bacteria; MicEx: MICROBExpress; RibE: RiboMinus Eukaryote. See materials and methods for kit descriptions.

|       | First kit | Input $\mu\text{l}$ | Input ng |      |           | Second kit | Input ng |      |           | Additional removal | Kit    | Input ng      |       |      | Additional removal | Estimated total removal |
|-------|-----------|---------------------|----------|------|-----------|------------|----------|------|-----------|--------------------|--------|---------------|-------|------|--------------------|-------------------------|
|       |           |                     | added    | left | Removal % |            | added    | left | Removal % |                    |        | $\mu\text{l}$ | input | left |                    |                         |
| S2a 1 | RiboBac   | 20                  | 2378     | 1164 | 51.0 %    | MicEx      | 13.5     | 1048 | 1004      | 2.0 %              | RibEuk | 11.5          | 3150  | 1870 | 16.8 %             | 69.9 %                  |
| S2a 2 | RiboBac   | 20                  | 5647     | 2396 | 57.6 %    | MicEx      | 13.5     | 2156 | 1919      | 4.7 %              | RibEuk | *             | *     | *    | *                  | *                       |
| S2a 3 | RiboBac   | 20                  | 5647     | 2362 | 58.2 %    | MicEx      | 13.5     | 2125 | 2007      | 2.3 %              |        |               |       |      |                    |                         |
| S2a 4 | RiboBac   | 20                  | 5647     | 2415 | 57.2 %    |            |          |      |           |                    |        |               |       |      |                    |                         |
| K1a 1 | RiboBac   | 20                  | 5661     | 2474 | 56.3 %    | MicEx      | 13.5     | 2227 | 2056      | 3.3 %              | RibEuk | 11.5          | 1713  | 995  | 17.1 %             | 76.7 %                  |
| K1a 2 | RiboBac   | 20                  | 5661     | 2342 | 58.6 %    | MicEx      | 13.5     | 2108 | 2082      | 0.5 %              |        |               |       |      |                    |                         |
| K1a 3 | RiboBac   | 20                  | 5661     | 2302 | 59.3 %    |            |          |      |           |                    |        |               |       |      |                    |                         |

**TABLE S3** RNA amplification using Message Amp II bacteria kit and cDNA synthesis to test applicability of amplified RNA.

|       | ng added | ng/ $\mu\text{l}$ |               | $\mu\text{g}$ | Nanodrop 260/280 ratio | Nanodrop 260/230 ratio | ng input cDNA test | output cDNA test | Nanodrop 260/280 ratio | Nanodrop 260/230 ratio |
|-------|----------|-------------------|---------------|---------------|------------------------|------------------------|--------------------|------------------|------------------------|------------------------|
|       |          | output            | $\mu\text{l}$ |               |                        |                        |                    |                  |                        |                        |
| S2a   | 12.5     | 481               | 150           | 72.15         | 2.83                   | 2.53                   |                    |                  |                        |                        |
| S2b   | 12.5     | 149               | 150           | 22.35         | 2.27                   | 1.66                   |                    |                  |                        |                        |
| K1a   | 12.5     | 531               | 150           | 79.65         | 2.72                   | 2.11                   | 1200               | 3072             | 1.92                   | 2.32                   |
| K1b   | 12.5     | 101               | 150           | 15.15         | 2.52                   | 2.17                   |                    |                  |                        |                        |
| K1c   | 12.5     | 152               | 150           | 22.8          | 2.63                   | 2.64                   |                    |                  |                        |                        |
| K1a_e | 12.5     | 141.5             | 150           | 21.225        | 2.18                   | 2.37                   | 1800               | 1500             | 1.81                   | 1.49                   |

**TABLE S4** The number of mRNA transcripts encoding key enzymes for methane oxidation assigned to the methanotrophic genus *Methylobacter* (all assigned to *M. tundripaludum*) at the different depths of peat in Knudsenheia and Solvatn. In brackets, the fraction of reads assigned to that specific function in the *M. tundripaludum* genome, out of all assigned reads to any genome in the RefSeq database, is shown.

| Predicted function                        | E.C.      | Gene ID      | Ka             | Kb             | Kc             | Sa           | Sb            |
|-------------------------------------------|-----------|--------------|----------------|----------------|----------------|--------------|---------------|
| Methane monooxygenase subunit C           | 1.14.18.3 | <i>pmoC</i>  | 360<br>(1.21)  | 229<br>(1.67)  | 265<br>(0.97)  | 8<br>(0.02)  | 117<br>(0.55) |
| Methane monooxygenase subunit B           | 1.14.18.3 | <i>pmoB</i>  | 116<br>(0.39)  | 102<br>(0.74)  | 143<br>(0.52)  | 2<br>(0.01)  | 24<br>(0.11)  |
| Methane monooxygenase subunit A           | 1.14.18.3 | <i>pmoA</i>  | 86<br>(0.29)   | 79<br>(0.58)   | 108<br>(0.40)  | 5<br>(0.02)  | 25<br>(0.12)  |
| PQQ-dependent methanol dehydrogenase      | 1.1.1.244 | <i>mxalF</i> | 18<br>(0.06)   | 13<br>(0.09)   | 7<br>(0.03)    | 0<br>(0)     | 4<br>(0.02)   |
| PQQ-dependent aldehyde dehydrogenase      | 1.2.99.3  | <i>aldh</i>  | 11<br>(0.04)   | 1<br>(0.01)    | 1<br>(0.004)   | 6<br>(0.02)  | 4<br>(0.02)   |
| Formaldehyde-activating enzyme            | 4.2.1.147 | <i>fae</i>   | 2<br>(0.01)    | 2<br>(0.01)    | 3<br>(0.01)    | 0<br>(0)     | 0<br>(0)      |
| Formate dehydrogenase                     | 1.2.1.2   | <i>fdh</i>   | 14<br>(0.05)   | 7<br>(0.05)    | 16<br>(0.06)   | 1<br>(0)     | 3<br>(0.01)   |
| Total assigned to <i>Methylobacter</i>    | -         | -            | 3671<br>(12.3) | 2516<br>(18.3) | 4181<br>(15.3) | 451<br>(1.4) | 832<br>(3.9)  |
| Total assigned to <i>Methylococcaceae</i> | -         | -            | 6448           | 4380           | 6927           | 1304         | 1761          |
| Total assigned to any RefSeq genome       | -         | -            | 298697         | 137257         | 272563         | 321674       | 214568        |
